# Supplementary material
Source: Springer Nature journal article supplement (https://www.springermedizin.de/resource/supplementary/12887_2009_369_MOESM2_ESM.pdf/9474952)

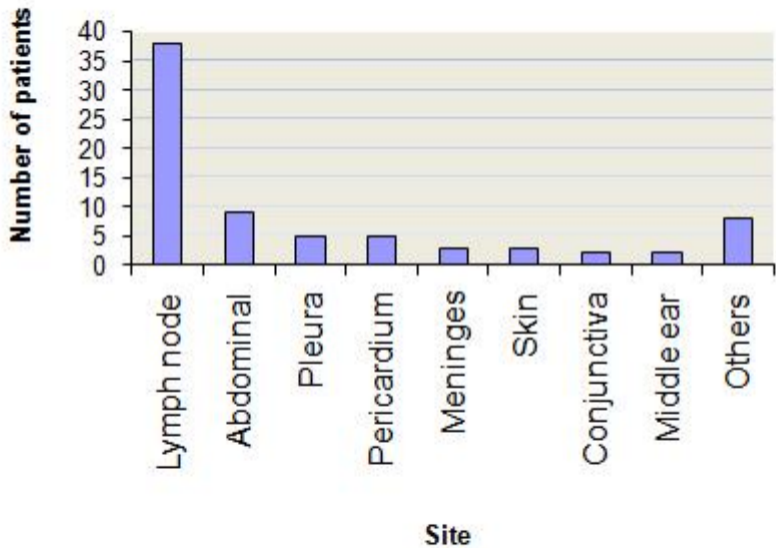

Supplement: MOESM2 [file 9474952]
